# Supplementary material for: Bioremediation with an Alkali-Tolerant Yeast of Wastewater (Nejayote) Derived from the Nixtamalization of Maize
Source: MDPI journal article supplement (doi:10.3390/fermentation10040219), 2024-04-17
Supplement: s1 [file s1]

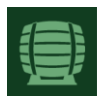

# Bioremediation with an alkali-tolerant yeast of wastewater (nejayote) derived from the nixtamalization of maize

Luis Carlos Román-Escobedo <sup>1</sup>, Eliseo Cristiani-Urbina <sup>1,\*</sup>, and Liliana Morales-Barrera <sup>1,\*</sup>

<sup>1</sup> Departamento de Ingeniería Bioquímica, Escuela Nacional de Ciencias Biológicas, Instituto Politécnico Nacional, Av. Wilfrido Massieu s/n, Unidad Profesional Adolfo López Mateos, Ciudad de México 07738, Mexico; ibqluisromanescobedo@gmail.com

\* Correspondence: ecristianiu@yahoo.com.mx (E.C.-U.); lmoralesb@ipn.mx (L.M.-B.); Tel.: +52-55-5729-6000 (ext. 57835) (E.C.-U.); Tel.: +52-55-5729-6000 (ext. 57827) (L.M.-B.)

GGAAGTAAAAGTCGTAACAAGGTTTCCGTAGGTGAACCTGCGGAAGGAT-  
CATTAGTGAATA-  
TAGGACGTCCAACCTTAACCTGGAGTCCGAACCTCTCACTTTCTAACCTGTG  
CACTTGTTTGGGATAGTAACCTCTCGCAAGAGAGCGAACTCCTATTCACTTA-  
TAAACACAA-  
AGTCTATGAATGTATTAAATTTTATAACAAAATAAACTTTCAACAACGGAT  
CTCTTGGCTCTCGCATCGATGAAGAACGCAGCGAAATGCGA-  
TAAGTAATGTGAATTGCAGAA-  
TTCAGTGAATCATCGAATCTTTGAACGCACCTTGCGCTCCATGGTATTCCGT  
GGAGCATGCCTGTTTGAGTGTCATGAATACTTCAACCCTCCTCTTTCT-  
TAATGATTGAAGA-  
GGTGTTTGGTTTCTGAGCGCTGCTGGCCTTTACGGTCTAGCTCGTTCGTAAT  
GCATTAGCATCCGCAATCGAACTTCGGATTGACTTGGCGTAATAGACTA-  
TTCGCTGAGGAA-  
TTCTAGTCTTCGGATTAGAGCCGGGTTGGGTTAAAGGAAGCTTCTAATCAG  
AATGTCTACATTTTAAGATTAGATCTCAAATCAGGTAGGACTAC-  
CCGCTGAACTTAAGCATATCAATAAGCGGAGGAAA

**Figure S1.** The sequence of the 18S-ITS1-5.8S-ITS2-26S region (642 nucleotides) of the rDNA in the *Rhodotorula mucilaginosa* LCRE strain.
